# Supplementary material for: Uptake Rates of Risk-Reducing Surgeries for Women at Increased Risk of Hereditary Breast and Ovarian Cancer Applied to Cost-Effectiveness Analyses: A Scoping Systematic Review
Source: MDPI journal article supplement (doi:10.3390/cancers14071786), 2022-03-31
Supplement: s1 [file s1]

# Uptake rates of risk-reducing surgeries for women at increased risk of hereditary breast and ovarian cancer applied to cost-effectiveness analyses

Julia Simões Corrêa Galendi <sup>1\*</sup>, Sibylle Kautz-Freimuth<sup>1</sup>, Stephanie Stock <sup>1</sup> and Dirk Müller <sup>1,\*</sup>

Contents:

File S1. Search Strategy

Table S1. Input parameters for the German model included in the value of information analysis (reproduction from Müller et al

Table S2. Input parameters for the German model not included in the value of information analysis (reproduction from Müller et al

Table S3. Excluded studies

File S1. Search Strategy

## Search term for literature search (PUBMED):

((costs and cost analysis[Mesh] OR decision support techniques\*[Mesh] OR cost-effectiveness[TIAB] OR cost-utility[TIAB] OR cost-benefit[TIAB])) AND ((breast neoplasms[Mesh]) OR (ovarian neoplasms[Mesh]) OR (breast-ovarian[TIAB]) OR population-based[TIAB] OR (mammary cancer[TIAB]) OR (mammalian carcinoma)) AND (early detection of cancer[Mesh] OR genetic testing[Mesh] OR mutation\*[TIAB] OR BRCA[TIAB] OR PALB2[TIAB] OR RAD51c/d[TIAB] OR TP53[TIAB] OR SNP[TIAB] OR ATM[TIAB])

## Search term for literature search in the CRD Database, NHS EED, HTA, DARE and CEA Registry:

((breast cancer OR ovarian cancer OR BRCA) AND (cost effectiveness OR cost utility OR cost benefit) AND (genetic testing OR gene analysis OR multigene assay))

Table S1. Input parameters for the German model included in the value of information analysis (reproduction from Müller et al [1]).

| Parameter Set                        | Input parameters                     | Value (SD)                                                                                                  | Distributions |
|--------------------------------------|--------------------------------------|-------------------------------------------------------------------------------------------------------------|---------------|
| Uptake rates                         | Uptake of RRM                        | 0.06 (0.02)                                                                                                 | Beta          |
|                                      | Uptake of RRSO                       | 0.42 (0.04)                                                                                                 | Beta          |
|                                      | Uptake of both RRSO                  | 0.45 (0.04)                                                                                                 | Beta          |
|                                      | Uptake of intensified surveillance   | 0.07 (0.02)                                                                                                 | Beta          |
| Incidence of cancer in BRCA carriers | Incidence of Breast Cancer Carriers  | 35–39: 0.031 (0.002), 40–44: 0.021 (0.002), 45–49: 0.023 (0.002), 50–54: 0.027 (0.002), ≥ 55: 0.033 (0.002) | Beta          |
|                                      | Incidence of Ovarian Cancer Carriers | 0.039 (0.005)                                                                                               | Beta          |

|                                                 |                                                                        |               |            |
|-------------------------------------------------|------------------------------------------------------------------------|---------------|------------|
|                                                 | Incidence of contralateral breast cancer Carriers                      | 0.067 (0.008) | beta       |
| <b>Risk reduction due to preventive surgery</b> | Risk reduction of breast cancer after RRM                              | 0.08 (0.01)   | Log-normal |
|                                                 | Risk reduction of breast cancer after RRM and RRSO                     | 0.05 (0.03)   | Log-normal |
|                                                 | Risk reduction of ovarian cancer after RRSO                            | 0.28 (0.01)   | Log-normal |
|                                                 | Risk reduction of ovarian cancer after RRM and RRSO                    | 0.14 (0.01)   | Log-normal |
|                                                 | Risk reduction of contralateral breast cancer after RRM                | 0.05 (0.01)   | Log-normal |
|                                                 | Risk reduction of contralateral breast cancer after RRM and RRSO       | 0.59 (0.02)   | Log-normal |
|                                                 |                                                                        |               |            |
| <b>Health related quality of life</b>           | Health related quality of life in stage well                           | 0.920 (0.002) | Beta       |
|                                                 | Health related quality of life in stage well with positive test result | 0.890 (0.02)  | Beta       |
|                                                 | Health related quality of life after RRSO                              | 0.850 (0.24), | Beta       |
|                                                 | Health related quality of life after RRM and RRSO                      | 0.830 (0.24), | Beta       |
|                                                 | Health related quality of life in stage breast cancer                  | 0.780 (0.25)  | Beta       |
|                                                 | Health related quality of life in stage metastatic breast cancer       | 0.679 (0.031) | Beta       |
|                                                 | Health related quality of life in stage ovarian cancer                 | 0.629 (0.045) | Beta       |
|                                                 | Health related quality of life in end stage ovarian cancer             | 0.52 (0.050)  | Beta       |
|                                                 |                                                                        | 0.160 (0.250) | Beta       |

Table S2. Input parameters for the German model not included in the value of information analysis (reproduction from Müller et al [1]).

| Parameter Set                         | Input parameters                                      | Value (SD)                                                                                              | Distributions |
|---------------------------------------|-------------------------------------------------------|---------------------------------------------------------------------------------------------------------|---------------|
| <b>Other transition probabilities</b> | Genetic testing positive                              | 0.24 (0.003)                                                                                            | Beta          |
|                                       | Incidence of Breast Cancer non Carriers               | 35–39: 0.004 (0.001), 40–44: 0.007 (0.001), 45–49: 0.008 (0.001), 50–54: 0.012 (0.002), ≥ 55: 0 (0.001) | Beta          |
|                                       | Incidence of Ovarian Cancer non Carriers              | 0.002 (0.001)                                                                                           | Beta          |
|                                       | Incidence of contralateral breast cancer non Carriers | 0.015 (0.003)                                                                                           | Beta          |
|                                       | Mortality of all causes                               | Age and gender specific                                                                                 | Beta          |
|                                       | Breast cancer mortality                               | 35–39: 0.00 (0.000), 40–49: 0.001 (0.000), 50–59: 0.002 (0.000), 60–69: 0.004 (0.000),                  | Beta          |

|                          |                                                                    |                                                                                           |       |
|--------------------------|--------------------------------------------------------------------|-------------------------------------------------------------------------------------------|-------|
|                          |                                                                    | 70–79: 0.007 (0.000), 80–89: 0.028 (0.001),<br>90–99: 0.139 (0.001), ≥ 100: 0.404 (0.002) |       |
|                          | Ovarian cancer mortality                                           | 0.015 (0.005)                                                                             | Beta  |
|                          | Incidence ovarian cancer in previous breast cancer patients        | 0.015 (0.005)                                                                             | Beta  |
|                          | Probability of developing metastasis in breast cancer patients     | All ages: 0.0267 (0.0055)                                                                 | Beta  |
| <b>Cost parameters</b>   | <b>Variable</b>                                                    | <b>Value in € (SD)</b>                                                                    |       |
| Diagnosis and monitoring |                                                                    |                                                                                           | Gamma |
|                          | Ongoing high-risk screening / monitoring                           | 560 (224)                                                                                 | Gamma |
| Surgical options         |                                                                    |                                                                                           |       |
|                          | Prophylactic mastectomy                                            | 8317 (3327)                                                                               | Gamma |
|                          | Prophylactic oophorectomy                                          | 2854 (1142)                                                                               |       |
|                          | Prophylactic mastectomy + oophorectomy                             | 11,171 (4468)                                                                             |       |
|                          | Prophylactic oophorectomy in case of BC                            | 2854 (1142)                                                                               |       |
|                          | Prophylactic mastectomy in case of OC                              | 4783 (1913)                                                                               |       |
|                          | Therapeutic mastectomy                                             | 6556 (2622)                                                                               | Gamma |
|                          | Breast-conserving surgery                                          | 4318 (1727)                                                                               | Gamma |
|                          | Therapeutic oophorectomy                                           | 2854 (1142)                                                                               | Gamma |
| Medication BC            |                                                                    |                                                                                           |       |
|                          | Chemotherapy BC (year 1, proportion in hormone receptor subgroups) |                                                                                           | Gamma |
|                          | Triple – (0.60)                                                    | 6371 (2548)                                                                               |       |
|                          | Her2neu (0.10)                                                     | 26,537 (10,615)                                                                           |       |
|                          | HR + (0.30)                                                        | 6371 (2548)                                                                               |       |
|                          | Chemotherapy metastatic BC                                         | 19,488 (7795)                                                                             |       |
|                          | Triple – (0.60)                                                    | 48,775 (19,510)                                                                           |       |
|                          | Her2neu (0.10)                                                     | 12,201 (4880)                                                                             |       |
|                          | HR + (0.30)                                                        |                                                                                           |       |
|                          | Endocrine therapy (Her2neu/HR) BC, year 1/year 2-5 metastatic BC   | 1120 (448) / 320 (128) / 1120 (448)                                                       | Gamma |
|                          | Neutropenic sepsis                                                 | 5782 (2313)                                                                               | Gamma |
|                          | Neulasta (Pegfilgrastim)                                           | 9852 (3941)                                                                               | Gamma |
|                          | Antiemetics                                                        | 495 (198)                                                                                 | Gamma |
|                          | Bisphosphonates                                                    | 421 (168)                                                                                 | Gamma |
| Other treatment BC       |                                                                    |                                                                                           |       |
|                          | Adjuvant radiotherapy                                              | 1791 (716)                                                                                | Gamma |
|                          | Local surgeries                                                    | 8381 (3328)                                                                               | Gamma |

|                 |                                                                       |                 |       |
|-----------------|-----------------------------------------------------------------------|-----------------|-------|
|                 | Psychological treatment in case of cancer diagnosis [EBM, Consortium] | 1231 (492)      | Gamma |
|                 | Lymphatic drainage / physiotherapy (BC)                               | 1480 (592)      | Gamma |
| Medication OC   |                                                                       |                 |       |
|                 | Not advanced                                                          | 10,387 (4155)   | Gamma |
|                 | Advanced                                                              | 30,080 (12,032) |       |
|                 | Recurrence (in advanced Ca)                                           |                 | Gamma |
|                 | Platin-resistant                                                      | 5408 (2163)     |       |
|                 | Platin-sensitive                                                      | 30,080 (12,032) |       |
| Palliative care |                                                                       |                 |       |
|                 | End of life treatment in metastatic BC or OC                          | 11,145 (4458)   | Gamma |

Table S3. Excluded studies

| Study/year          | Main reason for exclusion                                                |
|---------------------|--------------------------------------------------------------------------|
| Balmana 2005 [2]    | Risk reducing surgeries not considered                                   |
| Gamble 2017 [3]     | Populational testing                                                     |
| Patel 2018 [4]      | Populational testing                                                     |
| Rubinstein 2009 [5] | Populational testing                                                     |
| Manchanda 2015 [6]  | Risk reducing surgeries for sporadic cancer (not BRCA mutation carriers) |
| Manchanda 2016 [7]  | Risk reducing surgeries for sporadic cancer (not BRCA mutation carriers) |
| Manchanda 2017 [8]  | Populational testing                                                     |
| Manchanda 2018 [9]  | Populational testing                                                     |
| Zhang 2019 [10]     | Populational testing                                                     |
| Norum 2018 [11]     | Insufficient reporting of the uptake rates of risk-reducing surgeries    |
| Hoskins 2019 [12]   | Choice of uptake rates was based on assumed perfect adherence            |
| Tengs 2000 [13]     | Choice of uptake rates was based on assumed perfect adherence            |

## References

- Muller, D.; Danner, M.; Schmutzler, R.; Engel, C.; Wassermann, K.; Stollenwerk, B.; Stock, S.; Rhiem, K. Economic modeling of risk-adapted screen-and-treat strategies in women at high risk for breast or ovarian cancer. *Eur. J. Health. Econ.* **2019**, *20*, 739–750, doi:10.1007/s10198-019-01038-1.
- Balmana, J.; Sanz, J.; Bonfill, X.; Casado, A.; Rue, M.; Gich, I.; Diez, O.; Sabate, J.M.; Baiget, M.; Alonso, M.C. Genetic counseling program in familial breast cancer: analysis of its effectiveness, cost and cost-effectiveness ratio. *Int. J. Cancer* **2004**, *112*, 647–652, doi:10.1002/ijc.20458.
- Gamble, C.; Havrilesky, L.J.; Myers, E.R.; Chino, J.P.; Hollenbeck, S.; Plichta, J.K.; Kelly Marcom, P.; Shelley Hwang, E.; Kauff, N.D.; Greenup, R.A. Cost Effectiveness of Risk-Reducing Mastectomy versus Surveillance in BRCA Mutation Carriers with a History of Ovarian Cancer. *Ann. Surg. Oncol.* **2017**, *24*, 3116–3123, doi:10.1245/s10434-017-5995-z.
- Patel, S.; Legood, R.; Evans, D.G.; Turnbull, C.; Antoniou, A.C.; Menon, U.; Jacobs, I.; Manchanda, R. Cost effectiveness of population based BRCA1 founder mutation testing in Sephardi Jewish women. *Am. J. Obstet. Gynecol.* **2018**, *218*, 431 e431–431 e412, doi:10.1016/j.ajog.2017.12.221.
- Rubinstein, W.S.; Jiang, H.; Dellefave, L.; Rademaker, A.W. Cost-effectiveness of population-based BRCA1/2 testing and ovarian cancer prevention for Ashkenazi Jews: a call for dialogue. *Genet. Med.* **2009**, *11*, 629–639, doi:10.1097/GIM.0b013e3181afd322.
- Manchanda, R.; Legood, R.; Pearce, L.; Menon, U. Defining the risk threshold for risk reducing salpingo-oophorectomy for ovarian cancer prevention in low risk postmenopausal women. *Gynecologic Oncology* **2015**, *139*, 487–494, doi:10.1016/j.ygyno.2015.10.001.
- Manchanda, R.; Legood, R.; Antoniou, A.C.; Gordeev, V.S.; Menon, U. Specifying the ovarian cancer risk threshold of 'premenopausal risk-reducing salpingo-oophorectomy' for ovarian cancer prevention: a cost-effectiveness analysis. *J. Med. Genet.* **2016**, *53*, 591–599, doi:10.1136/jmedgenet-2016-103800.

8. Manchanda, R.; Patel, S.; Antoniou, A.C.; Levy-Lahad, E.; Turnbull, C.; Evans, D.G.; Hopper, J.L.; Macinnis, R.J.; Menon, U.; Jacobs, I.; et al. Cost-effectiveness of population based BRCA testing with varying Ashkenazi Jewish ancestry. *Am. J. Obstet. Gynecol.* **2017**, *217*, 578.e571–578.e512, doi:10.1016/j.ajog.2017.06.038.
9. Manchanda, R.; Patel, S.; Gordeev, V.S.; Antoniou, A.C.; Smith, S.; Lee, A.; Hopper, J.L.; MacInnis, R.J.; Turnbull, C.; Ramus, S.J.; et al. Cost-effectiveness of Population-Based BRCA1, BRCA2, RAD51C, RAD51D, BRIP1, PALB2 Mutation Testing in Unselected General Population Women. *J. Natl. Cancer Inst.* **2018**, *110*, 714–725, doi:10.1093/jnci/djx265.
10. Zhang, L.; Bao, Y.; Riaz, M.; Tiller, J.; Liew, D.; Zhuang, X.; Amor, D.J.; Huq, A.; Petelin, L.; Nelson, M.; et al. Population genomic screening of all young adults in a health-care system: a cost-effectiveness analysis. *Genet. Med.* **2019**, *21*, 1958–1968, doi:10.1038/s41436-019-0457-6.
11. Norum, J.; Grindedal, E.M.; Heramb, C.; Karsrud, I.; Ariansen, S.L.; Undlien, D.E.; Schlichting, E.; Maehle, L. BRCA mutation carrier detection. A model-based cost-effectiveness analysis comparing the traditional family history approach and the testing of all patients with breast cancer. *ESMO Open* **2018**, *3*, e000328, doi:10.1136/esmoopen-2018-000328.
12. Hoskins, P.; Eccleston, A.; Hurry, M.; Dyer, M. Targeted surgical prevention of epithelial ovarian cancer is cost effective and saves money in BRCA mutation carrying family members of women with epithelial ovarian cancer. A Canadian model. *Gynecol. Oncol.* **2019**, *153*, 87–91, doi:10.1016/j.ygyno.2019.01.018.
13. Tengs, T.O.; Berry, D.A. The cost effectiveness of testing for the BRCA1 and BRCA2 breast-ovarian cancer susceptibility genes. . Availabe online: <http://www.scopus.com/inward/record.url?scp=0033997009&partnerID=8YFLogxK> (accessed on 2 June 2021).
